# Supplementary material for: Influence of Provider and Leader Perspectives about Concurrent Tobacco-Use Care during Substance-Use Treatment on Their Tobacco Intervention Provision with Clients: A Mixed-Methods Study
Source: MDPI journal article supplement (doi:10.3390/ijerph20075260), 2023-03-24
Supplement: s1 [file ijerph-2149907-supplementary.pdf › ijerph-2149907-supplementary.pdf]

**Table S1.** Distribution of Providers' Perceptions about Concurrent Smoking/Tobacco Cessation and Non-nicotine Substance Use Treatment.

| Provider's Perceptions on Concurrent Smoking/Tobacco Cessation and Non-nicotine Substance Use Treatment                     | All Centers<br>% (n) |
|-----------------------------------------------------------------------------------------------------------------------------|----------------------|
| <b>In your opinion, what is the best point to encourage clients to stop smoking or using other tobacco products?</b>        |                      |
| As soon as client begins treatment                                                                                          | 39.76 (33)           |
| After 1 year of treatment                                                                                                   | 1.20 (1)             |
| It depends on the client                                                                                                    | 57.83 (48)           |
| Never                                                                                                                       | 1.20 (1)             |
| <b>If a client has been in recovery from alcoholism for &lt;6 months, quitting smoking would jeopardize their recovery.</b> |                      |
| Strongly disagree                                                                                                           | 21.69 (18)           |
| Disagree                                                                                                                    | 32.53 (27)           |
| Neither agree nor disagree                                                                                                  | 30.12 (25)           |
| Agree                                                                                                                       | 9.64 (8)             |
| Strongly agree                                                                                                              | 6.02 (5)             |

Note. N=83 due to missing data on one or more variables of interest.

**Table S2.** Providers' Perceptions on Concurrent Smoking/Tobacco Cessation and Non-nicotine Substance Use Treatment, and Providers' Provision of the 5A's for Smoking Cessation, by Center Type.

| Variables of Interest                                                                                                         | All Centers | Center Type |                 |              |                  | p-values <sup>s</sup> |
|-------------------------------------------------------------------------------------------------------------------------------|-------------|-------------|-----------------|--------------|------------------|-----------------------|
|                                                                                                                               |             | FQHC        | SUP within LMHA | LMHA overall | Stand-alone SUTC |                       |
|                                                                                                                               |             | % (n)       |                 |              |                  |                       |
| Provider's Perceptions on Concurrent Smoking/Tobacco Cessation and Non-nicotine Substance Use Treatment                       |             |             |                 |              |                  |                       |
| <b>In your opinion, what is the best point to encourage clients to stop smoking or using other tobacco products?</b>          |             |             |                 |              |                  | 0.1128                |
| Never/It depends on the client/After 1 year of treatment                                                                      | 60.24 (50)  | 88.89 (1)   | 40.00 (2)       | 43.75 (7)    | 62.26 (33)       |                       |
| As soon as client begins treatment                                                                                            | 39.76 (33)  | 11.11 (1)   | 60.00 (3)       | 56.25 (9)    | 37.74 (20)       |                       |
| <b>If a client has been in recovery from alcoholism for &lt;6 months, quitting smoking would jeopardize their recovery. ✧</b> |             |             |                 |              |                  | 0.2526                |
| Yes                                                                                                                           | 45.78 (38)  | 66.67 (6)   | 60.00 (3)       | 56.25 (9)    | 37.74 (20)       |                       |
| No                                                                                                                            | 54.22 (45)  | 33.33 (3)   | 40.00 (2)       | 43.75 (7)    | 62.26 (33)       |                       |
| Providers' Provision of the 5A's Smoking Cessation Intervention with Clients                                                  |             |             |                 |              |                  |                       |
| <b><u>Asks</u> clients about cigarette smoking</b>                                                                            |             |             |                 |              |                  | 0.3448                |
| Yes                                                                                                                           | 69.88 (58)  | 77.78 (7)   | 100.00 (5)      | 56.25 (9)    | 69.81 (37)       |                       |
| No                                                                                                                            | 30.12 (25)  | 22.22 (2)   | 0.00 (0)        | 43.75 (7)    | 30.19 (16)       |                       |
| <b><u>Advises</u> clients to quit smoking</b>                                                                                 |             |             |                 |              |                  | 0.1861                |
| Yes                                                                                                                           | 68.67 (57)  | 77.78 (7)   | 100.00 (5)      | 50.00 (8)    | 69.81 (37)       |                       |
| No                                                                                                                            | 31.33 (26)  | 22.22 (2)   | 0.00 (0)        | 50.00 (8)    | 30.19 (16)       |                       |
| <b><u>Assesses</u> client interest in quitting smoking</b>                                                                    |             |             |                 |              |                  | 0.2074                |
| Yes                                                                                                                           | 62.65 (52)  | 44.44 (4)   | 100.00 (5)      | 56.25 (9)    | 64.15 (34)       |                       |
| No                                                                                                                            | 37.35 (31)  | 55.56 (5)   | 0.00 (0)        | 43.75 (7)    | 35.85 (19)       |                       |
| <b><u>Assists</u> a smoking quit attempt</b>                                                                                  |             |             |                 |              |                  | 0.7466                |
| Yes                                                                                                                           | 57.83 (48)  | 66.67 (6)   | 80.00 (4)       | 56.25 (9)    | 54.72 (29)       |                       |

|                                      |            |           |           |            |            |        |
|--------------------------------------|------------|-----------|-----------|------------|------------|--------|
| No                                   | 42.17 (35) | 33.33 (3) | 20.00 (1) | 43.75 (7)  | 45.28 (24) | 0.6064 |
| <b><u>Arranges a follow-up</u></b> ◊ |            |           |           |            |            |        |
| Yes                                  | 33.73 (28) | 33.33 (3) | 60.00 (3) | 37.50 (6)  | 30.19 (16) |        |
| No                                   | 66.27 (55) | 66.67 (6) | 40.00 (2) | 62.50 (10) | 69.81 (37) |        |

---

Note. N=83 due to missing data on one or more of the variables of interest; LMHA=Local Mental Health Authority; ◊: Yes=Neither agree nor disagree, agree, or strongly agree, No=Strongly disagree or Disagree; ◊: Yes=Always or Most of the time, No=Never, Sometimes, or About half the time; §: p-value of Fisher's exact test.

**Table S3.** Providers' Perceptions on Concurrent Smoking/Tobacco Cessation and Non-nicotine Substance Use Treatment, and Providers' Provision of the 5A's for Smoking Cessation, by Numbers of Unique Clients Seen Annually.

| Variables of Interest                                                                                                         | All Centers | # of Unique Clients Seen Annually |            |            | p-values <sup>§</sup> |
|-------------------------------------------------------------------------------------------------------------------------------|-------------|-----------------------------------|------------|------------|-----------------------|
|                                                                                                                               |             | 50-200                            | 201-1,000  | >1,000     |                       |
|                                                                                                                               |             | % (n)                             |            |            |                       |
| <hr/>                                                                                                                         |             |                                   |            |            |                       |
| Provider's Perceptions on Concurrent Smoking/Tobacco Cessation and Non-nicotine Substance Use Treatment                       |             |                                   |            |            |                       |
| <hr/>                                                                                                                         |             |                                   |            |            |                       |
| <b>In your opinion, what is the best point to encourage clients to stop smoking or using other tobacco products?</b>          |             |                                   |            |            | 0.0621                |
| Never/It depends on the client/After 1 year of treatment                                                                      | 59.26 (48)  | 61.54 (16)                        | 69.44 (25) | 36.84 (7)  |                       |
| As soon as client begins treatment                                                                                            | 40.74 (33)  | 38.46 (10)                        | 30.56 (11) | 63.16 (12) |                       |
| <b>If a client has been in recovery from alcoholism for &lt;6 months, quitting smoking would jeopardize their recovery. ♦</b> |             |                                   |            |            | 0.7386                |
| Yes                                                                                                                           | 45.68 (37)  | 46.15 (12)                        | 41.67 (15) | 52.63 (10) |                       |
| No                                                                                                                            | 54.32 (45)  | 53.85 (14)                        | 58.33 (21) | 47.37 (9)  |                       |
| <hr/>                                                                                                                         |             |                                   |            |            |                       |
| Providers' Provision of the 5A's Smoking Cessation Intervention with Clients                                                  |             |                                   |            |            |                       |
| <hr/>                                                                                                                         |             |                                   |            |            |                       |
| <b><u>Asks clients about cigarette smoking</u>♦</b>                                                                           |             |                                   |            |            | 0.9366                |
| Yes                                                                                                                           | 70.37 (57)  | 69.23 (18)                        | 69.44 (25) | 73.68 (14) |                       |
| No                                                                                                                            | 29.63 (25)  | 30.77 (8)                         | 30.56 (11) | 26.32 (5)  |                       |
| <b><u>Advises clients to quit smoking</u>♦</b>                                                                                |             |                                   |            |            | 0.8450                |
| Yes                                                                                                                           | 69.14 (56)  | 65.38 (17)                        | 72.22 (26) | 68.42 (13) |                       |
| No                                                                                                                            | 30.86 (25)  | 34.62 (9)                         | 27.78 (10) | 31.58 (6)  |                       |
| <b><u>Assesses client interest in quitting smoking</u>♦</b>                                                                   |             |                                   |            |            | 0.3585                |
| Yes                                                                                                                           | 64.20 (52)  | 53.85 (14)                        | 66.67 (24) | 73.68 (14) |                       |
| No                                                                                                                            | 35.80 (29)  | 46.15 (12)                        | 33.33 (12) | 26.32 (5)  |                       |
| <b><u>Assists a smoking quit attempt</u>♦</b>                                                                                 |             |                                   |            |            | 0.1602                |
| Yes                                                                                                                           | 56.79 (46)  | 42.31 (11)                        | 66.67 (24) | 57.89 (11) |                       |

|                                      |            |            |            |            |        |
|--------------------------------------|------------|------------|------------|------------|--------|
| No                                   | 43.21 (35) | 57.69 (15) | 33.33 (12) | 42.11 (8)  | 0.4885 |
| <b><u>Arranges a follow-up</u></b> ◊ |            |            |            |            |        |
| Yes                                  | 32.10 (26) | 23.08 (6)  | 36.11 (13) | 36.84 (7)  |        |
| No                                   | 67.90 (55) | 76.92 (20) | 63.89 (23) | 63.16 (12) |        |

---

Note. N=83 due to missing data on one or more of the variables of interest; LMHA=Local Mental Health Authority; ◊: Yes=Neither agree nor disagree, agree, or strongly agree, No=Strongly disagree or Disagree; ◊: Yes=Always or Most of the time, No=Never, Sometimes, or About half the time; §: p-value of Chi-square test.

**Table S4.** Providers' Perceptions on Concurrent Smoking/Tobacco Cessation and Non-nicotine Substance Use Treatment, and Providers' Provision of the 5A's for Smoking Cessation, by Number of Full-time Employees.

| Variables of Interest                                                                                                         | All Centers | Number of Full-time Employees |            | p-values <sup>s</sup> |
|-------------------------------------------------------------------------------------------------------------------------------|-------------|-------------------------------|------------|-----------------------|
|                                                                                                                               |             | 1-50                          | >50        |                       |
|                                                                                                                               |             | % (n)                         |            |                       |
| <hr/>                                                                                                                         |             |                               |            |                       |
| Provider's Perceptions on Concurrent Smoking/Tobacco Cessation and Non-nicotine Substance Use Treatment                       |             |                               |            |                       |
| <b>In your opinion, what is the best point to encourage clients to stop smoking or using other tobacco products?</b>          |             |                               |            | 0.8984                |
| Never/It depends on the client/After 1 year of treatment                                                                      | 60.24 (50)  | 60.78 (31)                    | 59.38 (19) |                       |
| As soon as client begins treatment                                                                                            | 39.76 (33)  | 39.22 (20)                    | 40.63 (13) |                       |
| <b>If a client has been in recovery from alcoholism for &lt;6 months, quitting smoking would jeopardize their recovery. ♦</b> |             |                               |            | 0.5413                |
| Yes                                                                                                                           | 45.78 (38)  | 43.14 (22)                    | 50.00 (16) |                       |
| No                                                                                                                            | 54.22 (45)  | 56.86 (29)                    | 50.00 (16) |                       |
| <hr/>                                                                                                                         |             |                               |            |                       |
| Providers' Provision of the 5A's Smoking Cessation Intervention with Clients                                                  |             |                               |            |                       |
| <b><u>Asks</u> clients about cigarette smoking♦</b>                                                                           |             |                               |            | 0.2457                |
| Yes                                                                                                                           | 69.88 (58)  | 74.51 (38)                    | 62.50 (20) |                       |
| No                                                                                                                            | 30.12 (25)  | 25.49 (13)                    | 37.50 (12) |                       |
| <b><u>Advises</u> clients to quit smoking♦</b>                                                                                |             |                               |            | 0.0532                |
| Yes                                                                                                                           | 68.67 (57)  | 76.47 (39)                    | 56.25 (18) |                       |
| No                                                                                                                            | 31.33 (26)  | 23.53 (12)                    | 43.75 (14) |                       |
| <b><u>Assesses</u> client interest in quitting smoking♦</b>                                                                   |             |                               |            | 0.9821                |
| Yes                                                                                                                           | 62.65 (52)  | 62.75 (32)                    | 62.50 (20) |                       |
| No                                                                                                                            | 37.35 (31)  | 37.25 (19)                    | 37.50 (12) |                       |
| <b><u>Assists</u> a smoking quit attempt♦</b>                                                                                 |             |                               |            | 0.8215                |
| Yes                                                                                                                           | 57.83 (48)  | 56.86 (29)                    | 59.38 (19) |                       |
| No                                                                                                                            | 42.17 (35)  | 43.14 (22)                    | 40.63 (13) |                       |

**Arranges a follow-up**◊

0.9222

Yes

33.73 (28)

33.33 (17)

34.38 (11)

No

66.27 (55)

66.67 (34)

65.63 (21)

---

Note. N=83 due to missing data on one or more of the variables of interest; LMHA=Local Mental Health Authority; ◊: Yes=Neither agree nor disagree, agree, or strongly agree, No=Strongly disagree or Disagree; ◊: Yes=Always or Most of the time, No=Never, Sometimes, or About half the time; §: p-value of Chi-square test.

**Table S5.** Providers' Perceptions on Concurrent Smoking/Tobacco Cessation and Non-nicotine Substance Use Treatment, and Providers' Provision of the 5A's for Smoking Cessation, by Comprehensive Tobacco Free Workplace Policy Implementation.

| Variables of Interest                                                                                                         | All Centers | Comprehensive Tobacco Free Workplace Policy |            | p-values <sup>s</sup> |
|-------------------------------------------------------------------------------------------------------------------------------|-------------|---------------------------------------------|------------|-----------------------|
|                                                                                                                               |             | Yes                                         | No         |                       |
|                                                                                                                               |             | % (n)                                       |            |                       |
| <hr/>                                                                                                                         |             |                                             |            |                       |
| Provider's Perceptions on Concurrent Smoking/Tobacco Cessation and Non-nicotine Substance Use Treatment                       |             |                                             |            |                       |
| <b>In your opinion, what is the best point to encourage clients to stop smoking or using other tobacco products?</b>          |             |                                             |            | 0.1646                |
| Never/It depends on the client/After 1 year of treatment                                                                      | 60.24 (50)  | 52.50 (21)                                  | 67.44 (29) |                       |
| As soon as client begins treatment                                                                                            | 39.76 (33)  | 47.50 (19)                                  | 32.56 (14) |                       |
| <b>If a client has been in recovery from alcoholism for &lt;6 months, quitting smoking would jeopardize their recovery. ✧</b> |             |                                             |            | 0.5626                |
| Yes                                                                                                                           | 45.78 (38)  | 42.50 (17)                                  | 48.84 (21) |                       |
| No                                                                                                                            | 54.22 (45)  | 57.50 (23)                                  | 51.16 (22) |                       |
| <hr/>                                                                                                                         |             |                                             |            |                       |
| Providers' Provision of the 5A's Smoking Cessation Intervention with Clients                                                  |             |                                             |            |                       |
| <b><u>Asks</u> clients about cigarette smoking✧</b>                                                                           |             |                                             |            | 0.3500                |
| Yes                                                                                                                           | 69.88 (58)  | 65.00 (26)                                  | 74.42 (32) |                       |
| No                                                                                                                            | 30.12 (25)  | 35.00 (14)                                  | 25.58 (11) |                       |
| <b><u>Advises</u> clients to quit smoking✧</b>                                                                                |             |                                             |            | 0.0343                |
| Yes                                                                                                                           | 68.67 (57)  | 57.50 (23)                                  | 79.07 (34) |                       |
| No                                                                                                                            | 31.33 (26)  | 42.50 (17)                                  | 20.93 (9)  |                       |
| <b><u>Assesses</u> client interest in quitting smoking✧</b>                                                                   |             |                                             |            | 0.9782                |
| Yes                                                                                                                           | 62.65 (52)  | 62.50 (25)                                  | 62.79 (27) |                       |
| No                                                                                                                            | 37.35 (31)  | 37.50 (15)                                  | 37.21 (16) |                       |
| <b><u>Assists</u> a smoking quit attempt✧</b>                                                                                 |             |                                             |            | 0.6996                |
| Yes                                                                                                                           | 57.83 (48)  | 60.00 (24)                                  | 55.81 (24) |                       |



|                                      |            |            |            |        |
|--------------------------------------|------------|------------|------------|--------|
| No                                   | 42.17 (35) | 40.00 (16) | 44.19 (19) | 0.1033 |
| <b><u>Arranges a follow-up</u></b> ◊ |            |            |            |        |
| Yes                                  | 33.73 (28) | 42.50 (17) | 25.58 (11) |        |
| No                                   | 66.27 (55) | 57.50 (23) | 74.42 (32) |        |

---

Note. N=83 due to missing data on one or more of the variables of interest; LMHA=Local Mental Health Authority; ◊: Yes=Neither agree nor disagree, agree, or strongly agree, No=Strongly disagree or Disagree; ◊: Yes=Always or Most of the time, No=Never, Sometimes, or About half the time; §: p-value of Chi-square test.

**Table S6.** Texas Substance Use Treatment Providers' Smoking Intervention Practices with Clients Relative to Their Perceptions of Concurrent Smoking/Tobacco Cessation and Non-Nicotine Substance Use Treatment (Unadjusted Models).

|                |                                                                                                                                            | Unadjusted Model |       |                      |             |
|----------------|--------------------------------------------------------------------------------------------------------------------------------------------|------------------|-------|----------------------|-------------|
|                |                                                                                                                                            | Estimate         | SE    | OR<br>(95% CI)       | p-<br>value |
| <b>Ask</b>     | Intercept                                                                                                                                  | 1.723            | 0.485 |                      | <0.001      |
|                | <b>Perceived Best Point to Encourage Clients to Stop Smoking or Using Other Tobacco Products (ref: As soon as client begins treatment)</b> | -1.317           | 0.565 | 0.268 (0.089, 0.810) | 0.020       |
| <b>Advise</b>  | Intercept                                                                                                                                  | 1.504            | 0.451 |                      | 0.001       |
|                | <b>Perceived Best Point to Encourage Clients to Stop Smoking or Using Other Tobacco Products (ref: As soon as client begins treatment)</b> | -1.099           | 0.536 | 0.333 (0.117, 0.953) | 0.040       |
| <b>Assess</b>  | Intercept                                                                                                                                  | 1.312            | 0.426 |                      | 0.002       |
|                | <b>Perceived Best Point to Encourage Clients to Stop Smoking or Using Other Tobacco Products (ref: As soon as client begins treatment)</b> | -1.232           | 0.511 | 0.292 (0.107, 0.795) | 0.016       |
| <b>Assist</b>  | Intercept                                                                                                                                  | 0.833            | 0.379 |                      | 0.028       |
|                | <b>Perceived Best Point to Encourage Clients to Stop Smoking or Using Other Tobacco Products (ref: As soon as client begins treatment)</b> | -0.833           | 0.473 | 0.435 (0.172, 1.098) | 0.078       |
| <b>Arrange</b> | Intercept                                                                                                                                  | -0.182           | 0.350 |                      | 0.602       |
|                | <b>Perceived Best Point to Encourage Clients to Stop Smoking or Using Other Tobacco Products (ref: As soon as client begins treatment)</b> | -0.864           | 0.476 | 0.422 (0.166, 1.071) | 0.069       |
| <b>Ask</b>     | Intercept                                                                                                                                  | 1.253            | 0.359 |                      | <0.001      |
|                | <b>Perceives that Quitting Smoking Jeopardizes Recovery from Alcoholism (ref: No)</b>                                                      | -0.825           | 0.489 | 0.438 (0.168, 1.141) | 0.091       |
| <b>Advise</b>  | Intercept                                                                                                                                  | 1.012            | 0.337 |                      | 0.003       |
|                | <b>Perceives that Quitting Smoking Jeopardizes Recovery from Alcoholism (ref: No)</b>                                                      | -0.473           | 0.476 | 0.623 (0.245, 1.585) | 0.321       |

|                |                                                                                       |        |       |                      |       |
|----------------|---------------------------------------------------------------------------------------|--------|-------|----------------------|-------|
| <b>Assess</b>  | Intercept                                                                             | 0.795  | 0.322 |                      | 0.014 |
|                | <b>Perceives that Quitting Smoking Jeopardizes Recovery from Alcoholism (ref: No)</b> | -0.584 | 0.458 | 0.558 (0.227, 1.370) | 0.203 |
| <b>Assist</b>  | Intercept                                                                             | 0.693  | 0.316 |                      | 0.028 |
|                | <b>Perceives that Quitting Smoking Jeopardizes Recovery from Alcoholism (ref: No)</b> | -0.798 | 0.453 | 0.450 (0.185, 1.094) | 0.078 |
| <b>Arrange</b> | Intercept                                                                             | -0.405 | 0.304 |                      | 0.183 |
|                | <b>Perceives that Quitting Smoking Jeopardizes Recovery from Alcoholism (ref: No)</b> | -0.624 | 0.478 | 0.536 (0.210, 1.367) | 0.192 |

Notes. N=83 due to missing data on one or more of the variables of interest; FQHC = Federally Qualified Health Center; LMHA = Local Mental Health Authority; SUTC = substance use treatment center; ref = reference group (coded at 0) for statistical comparison; SE = standard error; OR = Odds Ratio; CI = Confidence Interval; Ask, Advise, Assess, Assist, and Arrange are coded as: Yes (1)=Always or Most of the time, No (0)=Never, Sometimes, or About half the time.
